# Supplementary material for: Stand-Alone Left Atrial appendage occlusion for throMboembolism prevention in nonvalvular Atrial fibrillatioN DiseasE Registry (SALAMANDER): protocol for a prospective observational nationwide study
Source: HighWire-hosted journal article supplement (doi:10.1136/bmjopen-2022-063990), 2022-09-01
Supplement: bmjopen-2022-063990supp001_data_supplement.pdf [file bmjopen-2022-063990supp001_data_supplement.pdf]

**List of enrolling centers:**

1. Department of Cardiac Surgery, Central Clinical Hospital of the Ministry of Interior, Centre of Postgraduate Medical Education, Warsaw, Poland;
2. Department of Cardiology and Structural Heart Diseases, Medical University of Silesia, Katowice, Poland;
3. Department of Cardiovascular Surgery and Transplantology, Jagiellonian University, John Paul II Hospital, Krakow, Poland;
4. Department of Invasive Cardiology, Center of Postgraduate Medical Education, Central Clinical Hospital of the Ministry of Interior and Administration
5. Department of Cardiology, Jagiellonian University Medical College, Krakow, Poland;
6. Department of Invasive Cardiology, Medical University of Bialystok, Poland;
7. Department of Cardiology, Poznan University of Medical Sciences, Poznań, Poland;
8. 1st Department of Cardiology, Medical University of Warsaw, 02-091 Warsaw, Poland.
9. Centre for Heart Disease, University Hospital Wroclaw Department of Heart Disease, Wroclaw Medical University, Poland;
10. Department of Cardiac Surgery, Medical University of Silesia, Katowice, Poland;
